# Supplementary material
Source: Copernicus journal article supplement (doi:10.5194/egusphere-2026-3050)
Supplement: Supplementary file 1 [file egusphere-2026-3050-supplement.pdf]

# Supplementary Material: Launch Emission Assessment Tool (LEAT v1.0): Part I - Development of a tool to calculate altitude-dependent rocket launch emissions for use in chemistry-climate models

Jan-Steffen Fischer<sup>1</sup>, Stefanos Fasoulas<sup>1</sup>, Matthias Nützel<sup>2,3</sup>, and Anja Schmidt<sup>2,3</sup>

<sup>1</sup>University of Stuttgart, Institute of Space Systems, Stuttgart, Germany

<sup>2</sup>Meteorologisches Institut München, Ludwig-Maximilians-Universität München, Munich, Germany

<sup>3</sup>Deutsches Zentrum für Luft- und Raumfahrt, Institut für Physik der Atmosphäre, Oberpfaffenhofen, Germany

**Correspondence:** Jan-Steffen Fischer (fischerj@irs.uni-stuttgart.de)

## Abstract.

This is the supplementary material containing additional information and Figures for the main paper.

*Copyright statement.* This work is licensed under CC BY 4.0. To view a copy of this license, visit <https://creativecommons.org/licenses/by/4.0/>

## S1 Additional Tables

### 5 S1.1 Stoichiometric equation

LOX/LH2

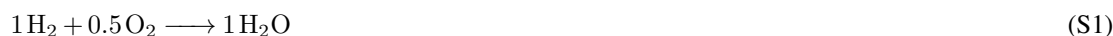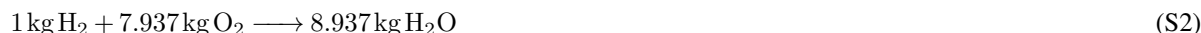

LOX/CH4

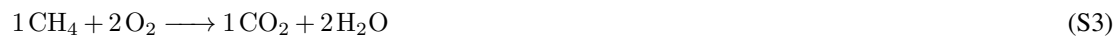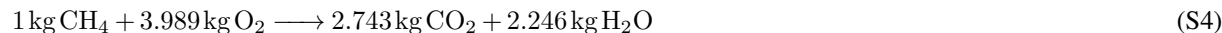

LOX/C3H8

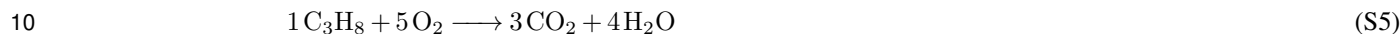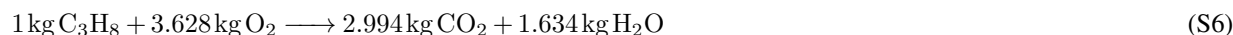

LOX/RP-1

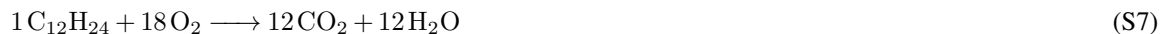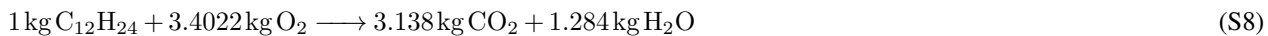

NTO/UDMH

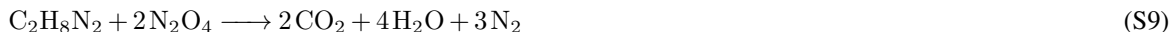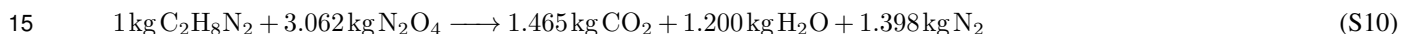

Solid

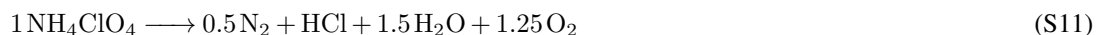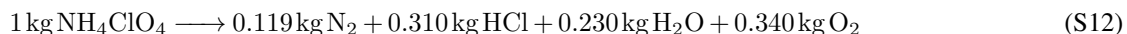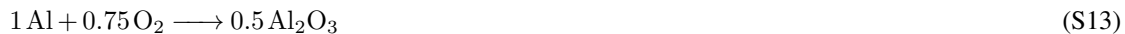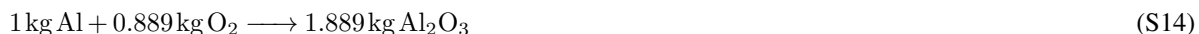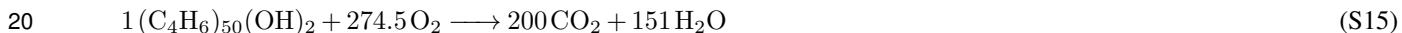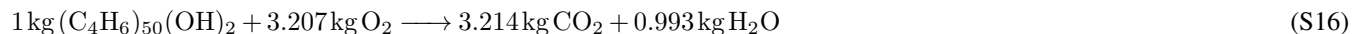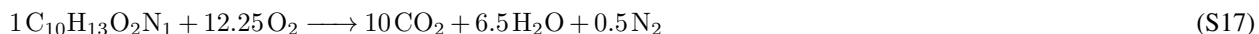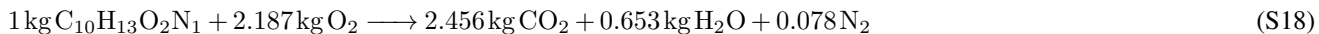

LOX/HTPB

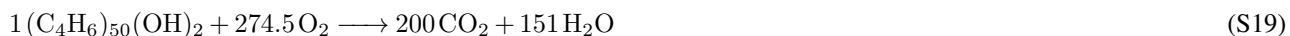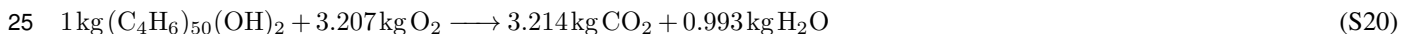

## S1.2 Emission indices in literature

**Table S1.** LOX/LH2 emissions in kg/kg burned propellant

| ROF              | 7.94:1<br>(stoic.) | 6:1<br>(typ.) | 4.9:1<br>(max <sup>a</sup> ) | Ryan<br>2022 | Larson<br>2017 | Ross<br>2014 | Ross <sup>c</sup><br>2009 | James <sup>d</sup><br>2021 | Pradon<br>2023 | Brown<br>2024 | Barker<br>2024 |
|------------------|--------------------|---------------|------------------------------|--------------|----------------|--------------|---------------------------|----------------------------|----------------|---------------|----------------|
| H <sub>2</sub> O | 1                  | 1.277         | 1.515                        | 1            | -              | 1            | 1.24                      | 0.965                      | 1.27           | 1             | 1.058          |
| H <sub>2</sub>   | -                  | -             | -                            | -            | -              | -            | -                         | 0.035                      | -              | -             | 0.035          |
| Sum              | 1                  | 1.277         | 1.515                        | 1            | -              | 1            | 1.24                      | 1                          | 1.27           | 1             | 1.093          |
| NOx              | -                  | -             | -                            | 0.033        | 0.033          | -            | 0.02                      | -                          | -              | 0.033         | -              |

**Table S2.** LOX/CH4 emissions in kg/kg burned propellant

| ROF              | 3.99:1<br>(stoic.) | 3.6:1<br>(typ.) | 3.5:1<br>(max <sup>a</sup> ) | James<br>2021 | Barker <sup>d</sup><br>2024 |
|------------------|--------------------|-----------------|------------------------------|---------------|-----------------------------|
| CO <sub>2</sub>  | 0.550              | 0.596           | 0.610                        | 0.360-0.492   | 0.426                       |
| CO               |                    |                 |                              | 0.051-0.189   | 0.12                        |
| OH               |                    |                 |                              | 0-0.002       |                             |
| H <sub>2</sub>   |                    |                 |                              | 0.002-0.011   | 0.006                       |
| H <sub>2</sub> O | 0.450              | 0.488           | 0.499                        | 0.439-0.452   | 0.446                       |
| Sum              | 1                  | 1.085           | 1.109                        | 0.852-1.146   | 0.998                       |
| BC               |                    |                 |                              | 0.005         | 0.998                       |
| NOx              |                    |                 |                              | -             | 0.005                       |

**Table S3.** LOX/RP-1 emissions in kg/kg burned propellant

| ROF              | 3.43:1<br>(stoic.) | 2.36:1<br>(typ.) | 2.8:1<br>(max <sup>a</sup> ) | Ryan<br>2022 | Larson<br>2017 | Ross<br>2014 | Ross <sup>c</sup><br>2009 | FAA<br>2020         | James<br>2021 | Pradon<br>2023 | Brown<br>2024 | Barker <sup>d</sup><br>2024 |
|------------------|--------------------|------------------|------------------------------|--------------|----------------|--------------|---------------------------|---------------------|---------------|----------------|---------------|-----------------------------|
| CO               | -                  | -                | -                            | -            | -              | -            | -                         | 0.2476              | 0.240-0.399   | -              | -             | 0.318                       |
| CO <sub>2</sub>  | 0.710              | 0.934            | 0.826                        | -            | -              | 0.6          | 0.88                      | 0.4062              | 0.335-0.470   | 0.91           | 0.6           | 0.637                       |
| H <sub>2</sub>   | -                  | -                | -                            | -            | -              | -            | -                         | -                   | 0.006-0.015   | -              | -             | 0.01                        |
| H <sub>2</sub> O | 0.290              | 0.382            | 0.338                        | 0.3          | -              | 0.35         | 0.3                       | 0.2434              | 0.250-0.284   | 0.36           | 0.35          | 0.34                        |
| Sum              | 1                  | 1.316            | 1.164                        | 0.3          | -              | 0.95         | 1.18                      | 0.897               | 0.581-0.884   | 1.27           | 0.95          | 1.305                       |
| BC               | -                  | -                | -                            | 0.035        | -              | 0.01-0.04    | 0.05 <sup>c</sup>         | 0.005               | 0.025         | -              | 0.02          | 0.022                       |
| NOx              | -                  | -                | -                            | 0.014        | 0.014±0.003    | -            | 0.02                      | 0.0121 <sup>b</sup> | -             | -              | 0.014         | -                           |

**Table S4.** N<sub>2</sub>O<sub>4</sub>/UDMH emissions in kg/kg burned propellant

| ROF              | 3.06:1<br>(stoic.) | 2.1:1<br>(typ.) | 2.9:1<br>(max <sup>a</sup> ) | Ryan<br>2022 | Ross<br>2014 | Ross <sup>c</sup><br>2009 | James <sup>d</sup><br>2021 | Pradon<br>2023 | Brown<br>2024 | Barker <sup>d</sup><br>2024 |
|------------------|--------------------|-----------------|------------------------------|--------------|--------------|---------------------------|----------------------------|----------------|---------------|-----------------------------|
| CO <sub>2</sub>  | 0.361              | 0.472           | 0.376                        | -            | 0.15         | 0.63                      | 0.289                      | 0.46           | 0.2           | 0.15                        |
| CO               |                    |                 |                              | -            | -            | -                         | 0.069                      | -              | -             | 0.069                       |
| H <sub>2</sub>   |                    |                 |                              | -            | -            | -                         | 0.004                      | -              | -             | 0.004                       |
| H <sub>2</sub> O | 0.295              | 0.387           | 0.307                        | 0.55         | 0.55         | 0.25                      | 0.29                       | 0.38           | 0.55          | 0.392                       |
| N <sub>2</sub>   | 0.344              | 0.451           | 0.359                        | -            | -            | 0.29                      | 0.348                      | -              | -             | -                           |
| Sum              | 1                  | 1.31            | 1.042                        | 0.55         | 0.7          | 1.17                      | 1                          | 0.84           | 0.75          | 0.615                       |
| BC               |                    |                 |                              | 0.004        | 0.02-0.08    | 0                         | 0.025                      | -              | 0.02          | 0.016                       |
| NOx              |                    |                 |                              | 0.02         | -            | 0.02                      | -                          | -              | 0.02          | 0.01                        |

**Table S5.** Solid emissions in kg/kg burned propellant

| ROF                            | HTPB<br>69:19:12 | PBAN<br>69:19:12 | Ryan<br>2022 | Ross<br>2014 | Ross <sup>c</sup><br>2009 | Pradon<br>2023 | Brown<br>2024 | James <sup>d</sup><br>2021 | Barker <sup>d</sup><br>2024 |
|--------------------------------|------------------|------------------|--------------|--------------|---------------------------|----------------|---------------|----------------------------|-----------------------------|
| CO <sub>2</sub>                | 0.386            | 0.295            | -            | 0.2          | 0.27                      | 0.44           | 0.3           | 0.013-0.048                | 0.112                       |
| CO                             | -                | -                | -            | -            | -                         | -              | -             | 0.188-0.251                | 0.227                       |
| OH                             | -                | -                | -            | -            | -                         | -              | -             | 0-0.006                    | -                           |
| H <sub>2</sub> O               | 0.278            | 0.237            | 0.34         | 0.35         | 0.48                      | 0.39           | 0.37          | 0.055-0.13                 | 0.302                       |
| N <sub>2</sub>                 | 0.082            | 0.091            | -            | -            | 0.08                      | -              | -             | 0.081-0.094                | -                           |
| HCl                            | 0.214            | 0.214            | 0.21         | -            | 0.15                      | 0.22           | -             | 0.194-0.212                | -                           |
| Cl                             | -                | -                | 0.003        | -            | -                         | -              | 0.21          | 0.003-0.022                | 0.217                       |
| Al <sub>2</sub> O <sub>3</sub> | 0.359            | 0.359            | 0.38         | 0.01-0.12    | 0.33                      | 0.34           | 0.38          | 0.3-0.359                  | 0.328                       |
| Sum                            | 1.319            | 1.196            | 0.933        | 0.56 - 0.67  | 1.31                      | 1.39           | 1.26          | 0.834 - 1.122              | 1.186                       |
| BC                             | -                | -                | 0.004        | 0.02-0.08    | -                         | -              | 0.02          | 0.025                      | 0.016                       |
| NOx                            | -                | -                | 0.003        | -            | 0.02                      | -              | 0.003         | 0-0.001                    | -                           |

**Table S6.** Hybrid (N<sub>2</sub>O<sub>4</sub>/HTPB) emissions in kg/kg burned propellant

| ROF              | 4.61:1<br>(stoic.) | 5.2:1<br>(typ.)    | 3.1:1<br>(max) | Ryan<br>2022 | Ross<br>2014 | James <sup>d</sup><br>2021 |
|------------------|--------------------|--------------------|----------------|--------------|--------------|----------------------------|
| CO <sub>2</sub>  | 0.573              | 0.518              | 0.784          | -            | 0.2          | 0.24                       |
| CO               |                    |                    |                |              |              | 0.099                      |
| H <sub>2</sub>   |                    |                    |                |              |              | 0.001                      |
| H <sub>2</sub> O | 0.177              | 0.160              | 0.242          | 0.3          | 0.2          | 0.1                        |
| N <sub>2</sub>   | 0.250              | 0.226              | 0.342          | -            | -            | 0.558                      |
| Sum              | 1.000              | 0.905              | 1.369          | 0.300        | 0.400        | 0.998                      |
| BC               | -                  | -                  | -              | 0.035        | 0.02-0.08    | 0.025                      |
| NOx              | -                  | 0.706 <sup>c</sup> | -              | 0.014        | -            | 0.004                      |

a) maximum  $ISP_{vac}$  calculated assuming  $p_c=100$  bar,  $A_e/A_t=50$  and equilibrium burning

b) after mixture with atmosphere

c) Ross 2009 does not distinguish between CO<sub>2</sub> and CO as well as H<sub>2</sub>O and H<sub>2</sub>, or ClOx and HOx and NOx

30 d) Primary emissions (mentioned here as secondary vary with altitude)

e) N<sub>2</sub>O<sub>4</sub> is emitted expected to react to NO<sub>2</sub>

For hydrazine engines, Ryan et al. (2022) only considered water vapour emissions. NOx emissions were assumed according to Larson et al. (2017) based on International Civil Aviation Organization database emissions and adapted to H<sub>2</sub>-engines. For LOX/RP-1, in addition to the sources mentioned so far, there is also the Falcon 9 environmental report with detailed lists of emissions Federal Aviation Administration (2020). These are not based on an equilibrium calculation. Values from James et al. (2021) and Barker et al. (2024) represent primary emissions at engine level. These publications consider afterburning and are therefore not directly used for the emission calculation.

35

### S1.3 Measurement data from literature

**Table S7.** Measurement data from literature

| Author                     | Year | Launch Vehicle | Time         | Altitude         | Species | Measurement value  | Unit            |
|----------------------------|------|----------------|--------------|------------------|---------|--------------------|-----------------|
| Ross et al. (1997)         | 1997 | Titan IV       | 29-30 min    | 18.9 km          | CL2     | 126±44             | ppbv            |
| Newman et al.              | 2001 | Soyuz          | 9-12 days    | 20 km            | CN      | up to 1000         | cm <sup>3</sup> |
|                            |      |                |              |                  | N2O     | 210-230            | ppbv            |
| Popp et al. (2002)         | 2002 | Athena 2       | 3.7-36.2 min | 16-18.6 km       | NO2     | 2.7±0.6            | g/kg            |
|                            |      |                |              |                  | CO2     | 382                | g/kg            |
|                            |      |                |              |                  | H2O     | 300                | g/kg            |
| Danilin et al. (2003)      | 2003 | Athena 2       | 3.7-36.2 min | 16-18.6 km       | Al2O3   | 362                | g/kg            |
|                            |      |                |              |                  | HCl     | 217                | g/kg            |
|                            |      |                |              |                  | NO      | 2-4                | g/kg            |
| SABRE Barker et al. (2026) | 2023 | Falcon 9       | 41-45 min    | 15.72 - 15.87 km | NOx     | 17.0±2.7 / 7.1±0.6 | ppb             |

## S1.4 Alumina particle formation

The implementation of particle sizes are currently not in the tool but mentioned here for discussion. Solid propellants produce solid aluminium particles in addition to black carbon particles. Their formation is described in more detail in the literature. Hermsen Hermsen (1981) give a particle distribution as a function of the nozzle throat diameter based on measured values. The corresponding formula is

$$d_{Al} = 3.6304(25.4d_t)^{0.2932}(1 - \exp(-0.0008163\varepsilon_c P_c 6894,76\tau)) \quad (\text{S21})$$

with  $d_{Al}$  the mass-weighted average diameter in  $\mu\text{m}$ ,  $d_t$  the throat diameter in mm,  $\varepsilon_c$  the concentration of  $\text{Al}_2\text{O}_3$  in the chamber in g-mole/100 g,  $P_c$  the chamber pressure in Pa and  $\tau$  the average chamber residence time in ms. Agglomeration also occurs here, so that the particles occur in different size distributions. Simmons et al. Simmons (2000) speak of an initial distribution of  $2 \mu\text{m}$  and a secondary distribution by agglomeration of  $100 \mu\text{m}$ .

## S1.5 Trajectory parameters

This is a detailed list of selected parameters from the *scenario\_input.xlsx*:

**Table S8.** Selected scenario parameters for emission calculation

| scenario       | 2025_Starship_IFT8  | 2023-013_Starlink5492       | 2025_Ariane_VA263   |
|----------------|---------------------|-----------------------------|---------------------|
| launch_vehicle | Starship V2.0 RTLS  | Falcon-9 v1.2 (Block5) ADSL | Ariane 62           |
| date           | 2025-03-06T23:30:31 | 2023-01-26T09:32:20         | 2025-03-06T16:24:00 |
| launch_site    | SB-OLPA             | CC-LC40                     | CSG-ELA4            |
| inclination    | 26.4                | 43.00                       | 98                  |
| azimuth        | 94.82               | 56.37                       | 351.96              |
| mass_payload   | 8000                | 16800                       | 3700                |
| h_gt_start     | 50                  | 140                         | 60                  |
| h_gt_end       | 100                 | 190                         | 110                 |
| gamma_gt_total | 0.5                 | 1.5                         | 1.6                 |
| t_startup      | 4                   | 4                           | 0                   |
| t_fr_start     | 48                  | 53                          | 50                  |
| t_fr_end       | 75                  | 65                          | 70                  |
| force_reduced  | 0.75                | 0.6                         | 0.8                 |

## S1.6 Engine parameters

**Table S9.** Engine parameters for exhaust calculation

|           | Raptor          | Vulcain 2.1 | Vulcain 2.1 GG | Merlin 1D | Merlin 1D GG | P120C       |     |
|-----------|-----------------|-------------|----------------|-----------|--------------|-------------|-----|
| $p_c$     | 300             | 118.8       | 130            | 97        | 200          | 105         | bar |
| $a_e/a_t$ | 34.34           | 32          | 2.3            | 16        | 1.36         | 11          | -   |
| $ROF$     | 3.6             | 6.03        | 0.9            | 2.36      | 0.3          | 69/19/12    | -   |
| fuel      | CH <sub>4</sub> | LH2         | LH2            | RP-1      | RP-1         | APN/AL/HTPB |     |
| oxidizer  | O2              | O2          | O2             | O2        | O2           |             |     |

For the Merlin 1D gas generator a ratio of the massflow  $m_{GG}/m_{CC} = 0.0427$  was chosen based on Federal Aviation Administration (2020). For the Vulcain

50 2.1 gas generator a ratio of the massflow  $m_{GG}/m_{CC} = 0.01534$  was chosen based on Safran.

## S1.7 Total emission species

**Table S10.** Falcon 9 launch total min and max emissions up to 100 km in kg. Sum represents sum of species in table, not total emissions.

|            | <b>Barker</b> | <b>LEAT CEA Equilibrium</b> |            | <b>LEAT CEA Frozen</b> |            | <b>LEAT Cantera</b> |            |
|------------|---------------|-----------------------------|------------|------------------------|------------|---------------------|------------|
|            | <b>total</b>  | <b>min</b>                  | <b>max</b> | <b>min</b>             | <b>max</b> | <b>min</b>          | <b>max</b> |
| <b>CO2</b> | 363904        | 109225                      | 246721     | 105625                 | 244830     | 125175              | 226083     |
| <b>CO</b>  | 10801         | 56200                       | 143710     | 57400                  | 145999     | 55977               | 120449     |
| <b>H2O</b> | 143872        | 82503                       | 114643     | 83964                  | 115094     | 92186               | 107132     |
| <b>OH</b>  | 0             | 12                          | 2549       | 28                     | 2831       | 112                 | 8399       |
| <b>NO</b>  | 1982          | 0                           | 2526       | 0                      | 2690       | 6                   | 12770      |
| <b>NO2</b> | 0             | 0                           | 4          | 0                      | 4          | 0                   | 11         |
| <b>O</b>   | 0             | 0                           | 301        | 0                      | 352        | 1                   | 2480       |
| <b>H</b>   | 0             | 7                           | 61         | 14                     | 79         | 15                  | 185        |
| <b>H2</b>  | 0             | 2047                        | 5721       | 1978                   | 5550       | 1460                | 3693       |
| <b>BC</b>  | 2658          | 2658                        | 2658       | 2658                   | 2658       | 2658                | 2658       |
| <b>Sum</b> | 523217        | 252652                      | 518893     | 251667                 | 520086     | 277590              | 483860     |

**Table S11.** Falcon 9 launch total emissions up to 100 km in kg for each  $x_{ab}$ . Sum represents sum of species in table, not total emissions.

| $x_{ab}$   | <b>Barker</b> | <b>LEAT CEA Equilibrium</b> |          |          |          | <b>LEAT CEA Frozen</b> |          |          |          | <b>LEAT Cantera</b> |          |          |          |
|------------|---------------|-----------------------------|----------|----------|----------|------------------------|----------|----------|----------|---------------------|----------|----------|----------|
|            | <b>N/A</b>    | <b>1.2</b>                  | <b>2</b> | <b>4</b> | <b>8</b> | <b>1.2</b>             | <b>2</b> | <b>4</b> | <b>8</b> | <b>1.2</b>          | <b>2</b> | <b>4</b> | <b>8</b> |
| <b>CO2</b> | 363904        | 109248                      | 142896   | 217243   | 246698   | 105635                 | 140189   | 214393   | 244819   | 125187              | 156819   | 196949   | 226066   |
| <b>CO</b>  | 10801         | 143696                      | 122280   | 74962    | 56214    | 145992                 | 124000   | 76773    | 57407    | 120342              | 100189   | 74596    | 55990    |
| <b>H2O</b> | 143872        | 82503                       | 96810    | 108881   | 114643   | 83964                  | 97688    | 109352   | 115094   | 92246               | 99904    | 103745   | 107060   |
| <b>OH</b>  | 0             | 13                          | 409      | 1953     | 896      | 31                     | 542      | 2180     | 1032     | 112                 | 2901     | 6959     | 7713     |
| <b>NO</b>  | 1982          | 0                           | 109      | 2081     | 1382     | 0                      | 140      | 2221     | 1503     | 6                   | 1017     | 6059     | 12770    |
| <b>NO2</b> | 0             | 0                           | 0        | 1        | 4        | 0                      | 0        | 1        | 4        | 0                   | 0        | 3        | 11       |
| <b>O</b>   | 0             | 0                           | 18       | 209      | 112      | 0                      | 26       | 244      | 133      | 1                   | 387      | 1788     | 2340     |
| <b>H</b>   | 0             | 9                           | 29       | 35       | 34       | 17                     | 43       | 48       | 46       | 17                  | 99       | 129      | 128      |
| <b>H2</b>  | 0             | 5721                        | 4076     | 2628     | 2047     | 5550                   | 3958     | 2550     | 1978     | 3690                | 2584     | 1880     | 1460     |
| <b>BC</b>  | 2658          | 2658                        | 2658     | 2658     | 2658     | 2658                   | 2658     | 2658     | 2658     | 2658                | 2658     | 2658     | 2658     |
| <b>Sum</b> | 523217        | 343847                      | 369286   | 410651   | 424688   | 343847                 | 369244   | 410422   | 424674   | 344259              | 366557   | 394766   | 416195   |

**Table S12.** Starship launch total min and max emissions up to 100 km in kg. Sum represents sum of species in table, not total emissions.

|            | <b>Barker<br/>total</b> | <b>LEAT CEA Equilibrium</b> |            | <b>LEAT CEA Frozen</b> |            | <b>LEAT Cantera</b> |            |
|------------|-------------------------|-----------------------------|------------|------------------------|------------|---------------------|------------|
|            |                         | <b>min</b>                  | <b>max</b> | <b>min</b>             | <b>max</b> | <b>min</b>          | <b>max</b> |
| <b>CO2</b> | 1741913                 | 1334643                     | 1549851    | 1302136                | 1509592    | 1337621             | 1491421    |
| <b>CO</b>  | 58264                   | 145990                      | 282960     | 171647                 | 303684     | 184060              | 282755     |
| <b>H2O</b> | 1490571                 | 1348485                     | 1394015    | 1340479                | 1380251    | 1355914             | 1385823    |
| <b>OH</b>  | 0                       | 6867                        | 14135      | 15483                  | 23837      | 1783                | 25037      |
| <b>NO</b>  | 17134                   | 56                          | 4817       | 201                    | 6598       | 75                  | 9974       |
| <b>NO2</b> | 0                       | 0                           | 3          | 0                      | 4          | 0                   | 5          |
| <b>O</b>   | 0                       | 428                         | 863        | 1444                   | 2225       | 15                  | 2251       |
| <b>H</b>   | 0                       | 338                         | 383        | 632                    | 702        | 62                  | 289        |
| <b>H2</b>  | 0                       | 5847                        | 11341      | 6519                   | 11372      | 6568                | 10980      |
| <b>BC</b>  | 4942                    | 4942                        | 4942       | 4942                   | 4942       | 4942                | 4942       |
| <b>Sum</b> | 3312825                 | 2847596                     | 3263311    | 2843483                | 3243207    | 2891040             | 3213476    |

**Table S14.** Ariane 6 launch total min and max emissions up to 100 km in kg. Sum represents sum of species in table, not total emissions.

|              | <b>Barker<br/>total</b> | <b>LEAT CEA Equilibrium</b> |            | <b>LEAT CEA Frozen</b> |            |
|--------------|-------------------------|-----------------------------|------------|------------------------|------------|
|              |                         | <b>min</b>                  | <b>max</b> | <b>min</b>             | <b>max</b> |
| <b>CO2</b>   | 125631                  | 13629                       | 78987      | 13507                  | 78888      |
| <b>CO</b>    | 2308                    | 16242                       | 57839      | 16304                  | 57916      |
| <b>H2O</b>   | 243122                  | 58489                       | 98085      | 58303                  | 98144      |
| <b>N2</b>    | 0                       | 23496                       | 42522      | 21694                  | 22939      |
| <b>HCl</b>   | 38685                   | 45443                       | 56813      | 45600                  | 56824      |
| <b>Cl</b>    | 4896                    | 1471                        | 8734       | 1473                   | 8718       |
| <b>Cl2</b>   | 16268                   | 1                           | 7634       | 1                      | 7496       |
| <b>Al2O3</b> | 90462                   | 98959                       | 99001      | 98957                  | 98998      |
| <b>OH</b>    | 0                       | 84                          | 2493       | 88                     | 2511       |
| <b>NO</b>    | 2110                    | 10                          | 2720       | 12                     | 2702       |
| <b>NO2</b>   | 0                       | 0                           | 3          | 0                      | 3          |
| <b>O</b>     | 0                       | 4                           | 446        | 4                      | 443        |
| <b>H</b>     | 0                       | 90                          | 216        | 93                     | 220        |
| <b>H2</b>    | 0                       | 2221                        | 6614       | 2228                   | 6631       |
| <b>BC</b>    | 2078                    | 2078                        | 2078       | 2078                   | 2078       |
| <b>Sum</b>   | 525561                  | 262218                      | 464185     | 260342                 | 444512     |

**Table S13.** Starship launch total emissions up to 100 km in kg for each  $x_{ab}$ . Sum represents sum of species in table, not total emissions.

| $x_{ab}$ | Barker  | LEAT CEA Equilibrium |         |         |         | LEAT CEA Frozen |         |         |         | LEAT Cantera |         |         |         |
|----------|---------|----------------------|---------|---------|---------|-----------------|---------|---------|---------|--------------|---------|---------|---------|
|          |         | 1.2                  | 2       | 4       | 8       | 1.2             | 2       | 4       | 8       | 1.2          | 2       | 4       | 8       |
| CO2      | 1741913 | 1334643              | 1372296 | 1461849 | 1549851 | 1302136         | 1338205 | 1418094 | 1509592 | 1337793      | 1371003 | 1435263 | 1490752 |
| CO       | 58264   | 282960               | 258995  | 201999  | 145990  | 303684          | 280727  | 229881  | 171647  | 282245       | 260701  | 219786  | 184365  |
| H2O      | 1490571 | 1348486              | 1358920 | 1377894 | 1394015 | 1340479         | 1348824 | 1363920 | 1380251 | 1359219      | 1367637 | 1378273 | 1382699 |
| OH       | 0       | 6867                 | 7824    | 11459   | 13741   | 15483           | 17224   | 21531   | 23286   | 1783         | 4770    | 13660   | 25037   |
| NO       | 17134   | 56                   | 210     | 1342    | 4817    | 201             | 660     | 2474    | 6598    | 75           | 366     | 2695    | 9974    |
| NO2      | 0       | 0                    | 0       | 0       | 3       | 0               | 0       | 1       | 4       | 0            | 0       | 1       | 5       |
| O        | 0       | 428                  | 456     | 631     | 849     | 1444            | 1545    | 1901    | 2198    | 15           | 111     | 742     | 2251    |
| H        | 0       | 358                  | 368     | 376     | 349     | 693             | 700     | 691     | 633     | 62           | 126     | 214     | 285     |
| H2       | 0       | 11341                | 10106   | 7759    | 5847    | 11372           | 10327   | 8392    | 6519    | 10921        | 9679    | 7871    | 6616    |
| BC       | 4942    | 4942                 | 4942    | 4942    | 4942    | 4942            | 4942    | 4942    | 4942    | 4942         | 4942    | 4942    | 4942    |
| Sum      | 3312825 | 2990080              | 3014118 | 3068253 | 3120405 | 2980434         | 3003154 | 3051828 | 3105669 | 2997055      | 3019336 | 3063448 | 3106926 |

**Table S15.** Ariane 6 launch total emissions up to 100 km in kg for each  $x_{ab}$ . Sum represents sum of species in table, not total emissions.

| $x_{ab}$     | <b>Barker</b> | <b>LEAT CEA Equilibrium</b> |          |          |          | <b>LEAT CEA Frozen</b> |          |          |          |
|--------------|---------------|-----------------------------|----------|----------|----------|------------------------|----------|----------|----------|
|              | <b>N/A</b>    | <b>1.2</b>                  | <b>2</b> | <b>4</b> | <b>8</b> | <b>1.2</b>             | <b>2</b> | <b>4</b> | <b>8</b> |
| <b>CO2</b>   | 125631        | 13629                       | 52994    | 71155    | 78987    | 13507                  | 52693    | 71043    | 78888    |
| <b>CO</b>    | 2308          | 57839                       | 32785    | 21227    | 16242    | 57916                  | 32975    | 21297    | 16304    |
| <b>CH4</b>   | 0             | 0                           | 0        | 0        | 0        | 0                      | 0        | 0        | 0        |
| <b>H2O</b>   | 243122        | 71941                       | 85507    | 88182    | 90143    | 71796                  | 85679    | 88127    | 90064    |
| <b>N2</b>    | 0             | 23496                       | 25003    | 30893    | 42522    | 22930                  | 22183    | 22397    | 22699    |
| <b>HCl</b>   | 38685         | 56566                       | 52696    | 53760    | 47071    | 56574                  | 52727    | 53780    | 47230    |
| <b>Cl</b>    | 4896          | 2392                        | 6146     | 4705     | 4011     | 2385                   | 6115     | 4699     | 3995     |
| <b>Cl2</b>   | 16268         | 1                           | 15       | 428      | 7634     | 1                      | 14       | 415      | 7496     |
| <b>Al2O3</b> | 90462         | 98965                       | 98980    | 98992    | 98998    | 98963                  | 98977    | 98990    | 98996    |
| <b>OH</b>    | 0             | 311                         | 1565     | 997      | 887      | 344                    | 1581     | 1022     | 913      |
| <b>NO</b>    | 2110          | 101                         | 1681     | 1188     | 548      | 123                    | 1665     | 1192     | 551      |
| <b>NO2</b>   | 0             | 0                           | 1        | 3        | 2        | 0                      | 1        | 3        | 2        |
| <b>O</b>     | 0             | 10                          | 189      | 170      | 196      | 11                     | 189      | 170      | 196      |
| <b>H</b>     | 0             | 154                         | 150      | 139      | 131      | 158                    | 154      | 143      | 135      |
| <b>H2</b>    | 0             | 6614                        | 3846     | 2832     | 2221     | 6631                   | 3860     | 2840     | 2228     |
| <b>BC</b>    | 2078          | 2078                        | 2078     | 2078     | 2078     | 2078                   | 2078     | 2078     | 2078     |
| <b>Sum</b>   | 525561        | 334099                      | 363637   | 376749   | 391672   | 333417                 | 360892   | 368197   | 371775   |

## S2 Additional Figures

### S2.1 Trajectory subroutine

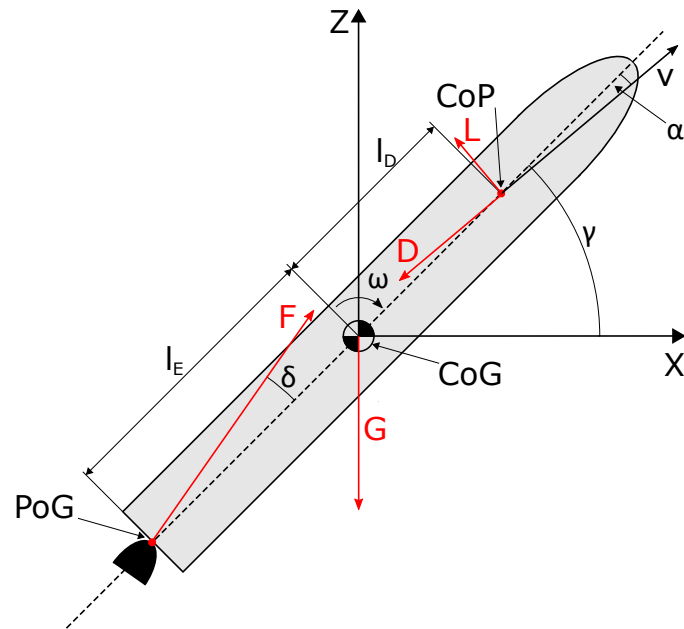

**Figure S1.** Forces and parameters for trajectory calculation during the ascend.

$D$  = Drag [N]

$F$  = Thrust [N]

$G$  = Gravitation [N]

$L$  = Lift [N]

$l_D$  = Leverage arm drag force [m]

$l_E$  = Leverage arm thrust force [m]

$v$  = Flight path velocity [m/s]

$m$  = Mass of total system [kg]

$\alpha$  = Angle of attack [°]

$\gamma$  = Angle to ground [°]

$\delta$  = Angle of gimbal [°]

$\omega$  = Rotational speed around Y-axis [°/s]

CoG = Center of gravity

CoP = Center of pressure

PoG = Point of gimbal

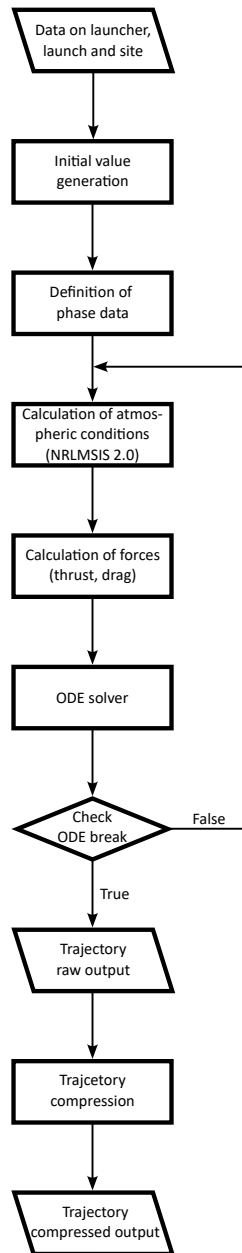

**Figure S2.** Schematic overview of the trajectory calculation logic. Rectangles represent programmes, trapezoids represent inputs/outputs, and diamonds represent decisions. The program calculates the ascent trajectory by solving the equations of motion and consideration of atmospheric conditions with the NRLMSIS model. Further details are explained in the main text.

## S2.2 Emission calculation

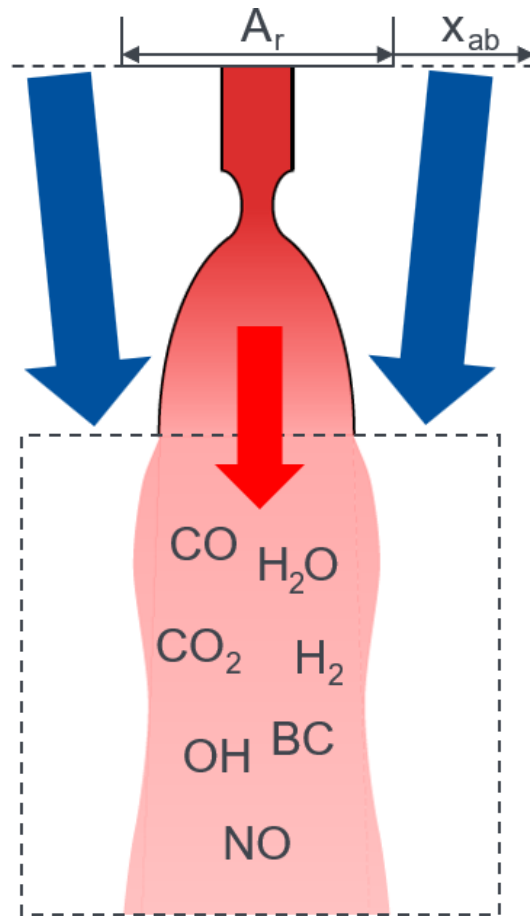

**Figure S3.** Afterburning control volume with incoming engine exhaust (red) and ambient air (blue). Incoming massflow of air is dependent on uncertainty factor  $x_{ab}$  which defines the  $A_{air}$  dependent on rocket area  $A_r$

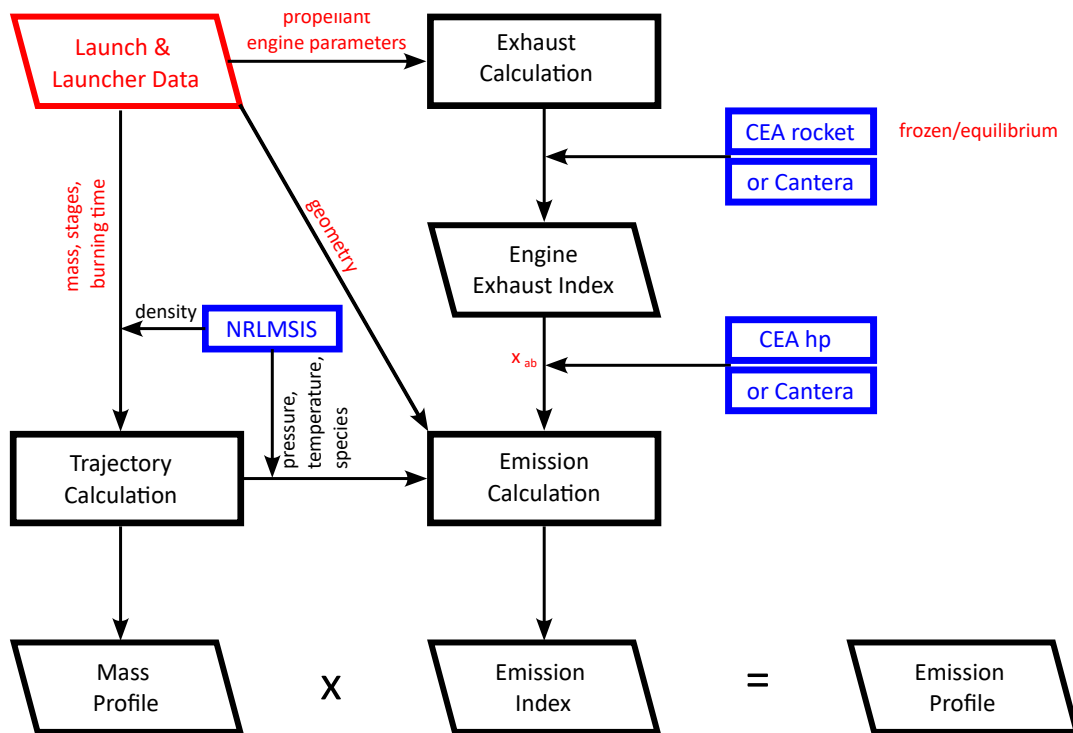

**Figure S4.** Schematic overview of the CEA and Cantera calculation logic. Rectangles represent programmes, trapezoids represent input-outputs, and diamonds represent decisions. Input parameters are shown in red, external software implemented is shown in blue. NRLMSIS is an atmospheric model, CEA and Cantera are combustion models. Mass profile and emission index could also be implemented directly by the user. Details are explained in the text.

### 55 S2.3 Exhaust evaluation

For the exhaust calculation the specific engine and propellant parameters for the Merlin engine (LOX/RP-1), Raptor engine (LOX/LCH4), Vulcain 2.1 engine (LOX/LH2) and P120 rocket motor (HTPB/Al/APN) were taken into account and calculated for the different methodologies at nozzle level exit. For Merlin and Vulcain 2.1 an additional parallel gas generator combustion were taken into account. Parameters can be found in the supplementary material within the engine worksheet in the LV-Database-file.

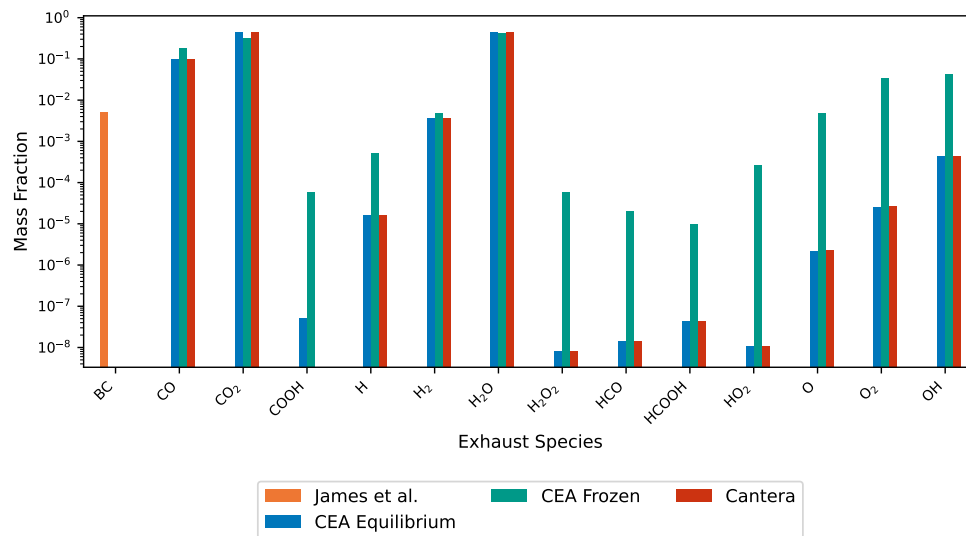

(a) Starship Raptor engine exhaust

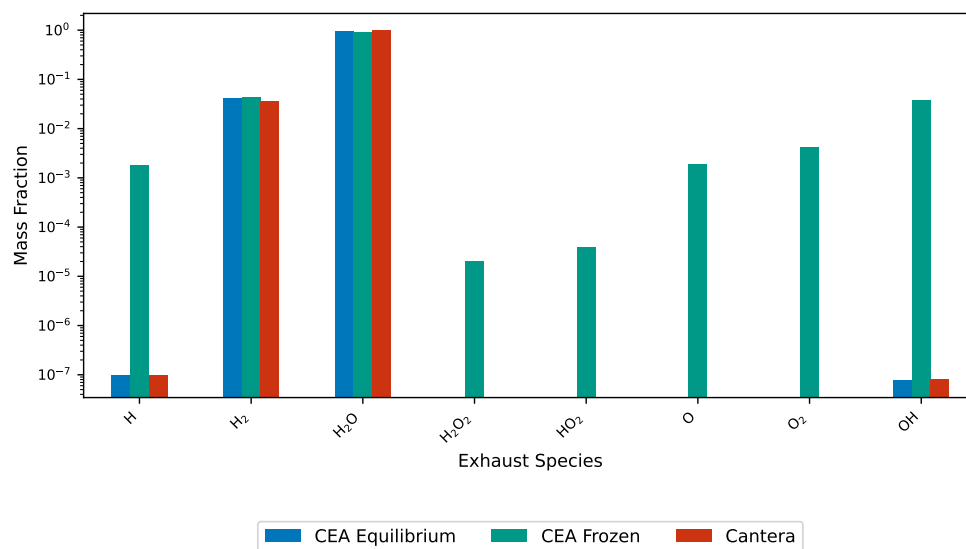

(b) Ariane 6 Vulcain 2.1 exhaust

**Figure S5.** Exhaust at engine level of a) a Starship Raptor engine and b) an Ariane 6 Vulcain 2.1 exhaust shown for CEA equilibrium and frozen calculation methodologies in logarithmic scale. Species with a massfraction less than  $1e-10$  are not shown. A higher variety of species can be seen for the equilibrium methodology for solid engines and frozen methodology for liquid engines. CEA equilibrium and Cantera showing consistency of results. For Vulcain 2.1 an additional gas generator was considered, which leads to slightly more  $H_2$  emissions compared to Cantera. James et al. (2021). BC estimation showing a consistency with additional calculation. CEA frozen calculation leads to more species.

## 60 S2.4 Emission evaluation

For the emission profiles the  $x_{ab}$  was deviated between 1.2, 2, 4 and 8. This should cover an reasonable area based on expert judgement. A further discussion on this uncertainty impact will be given in the second part of the paper.

### S2.4.1 Falcon 9

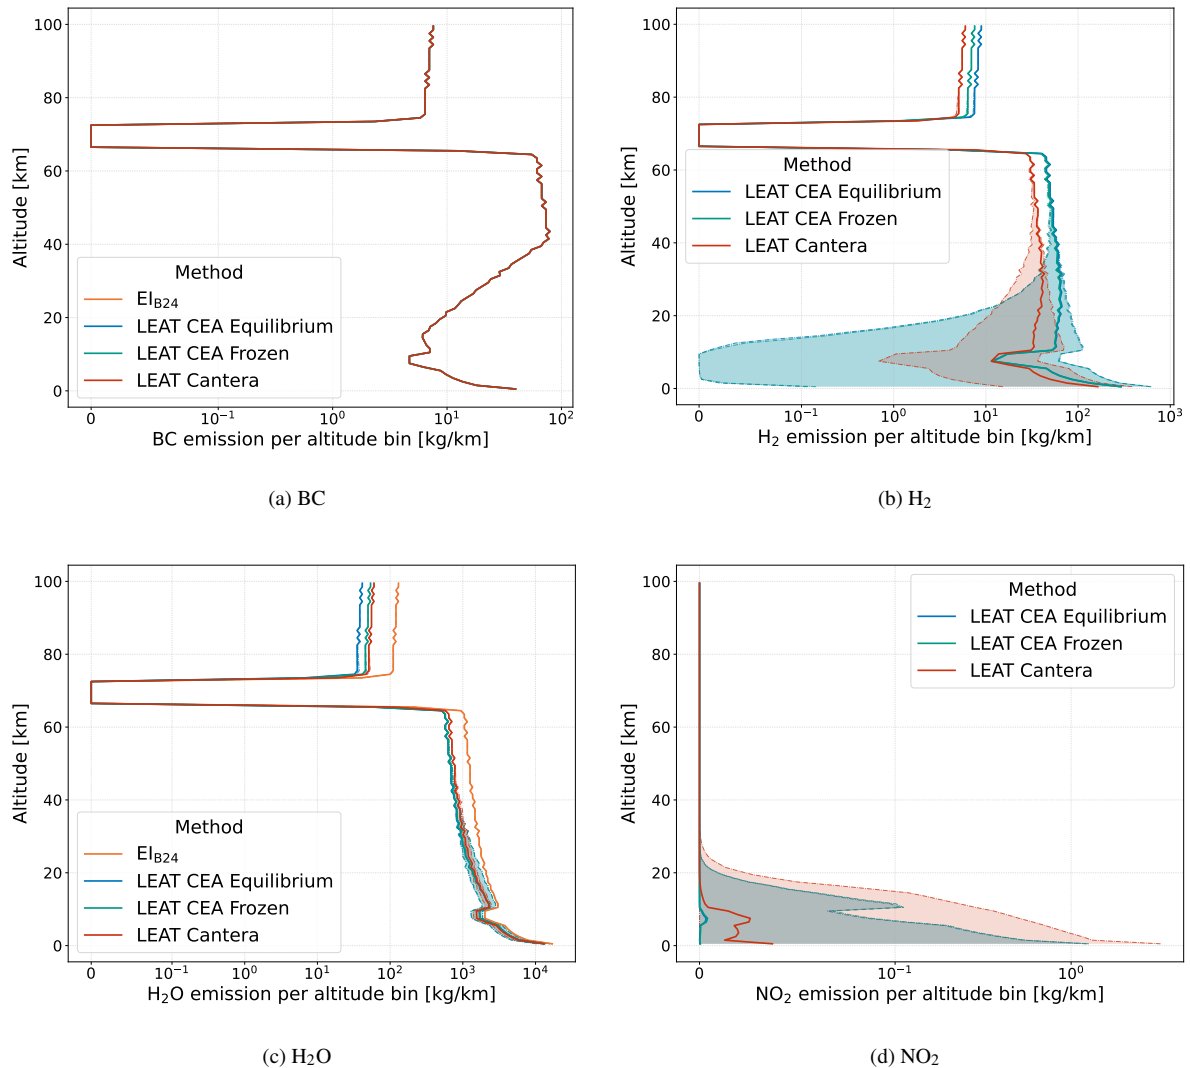

**Figure S6.** Final emission of Falcon 9 launch depending on altitude shown for different calculation methodologies. Area represents  $x_{ab} = 1.2 - 8$ , line represents  $x_{ab} = 2$ .

## S2.4.2 Starship

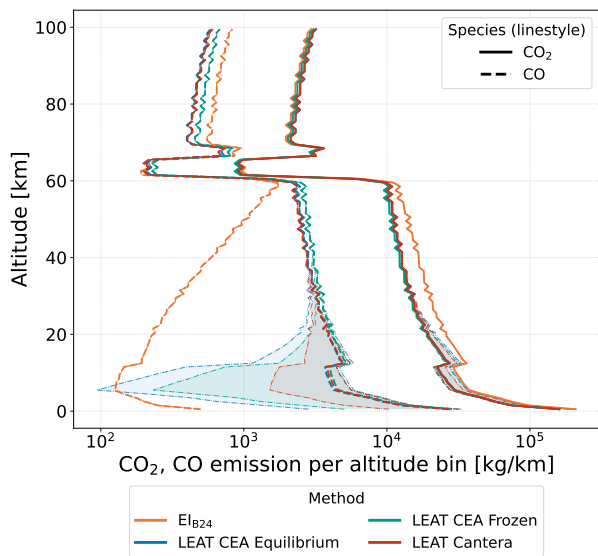

(a) CO<sub>2</sub> and CO

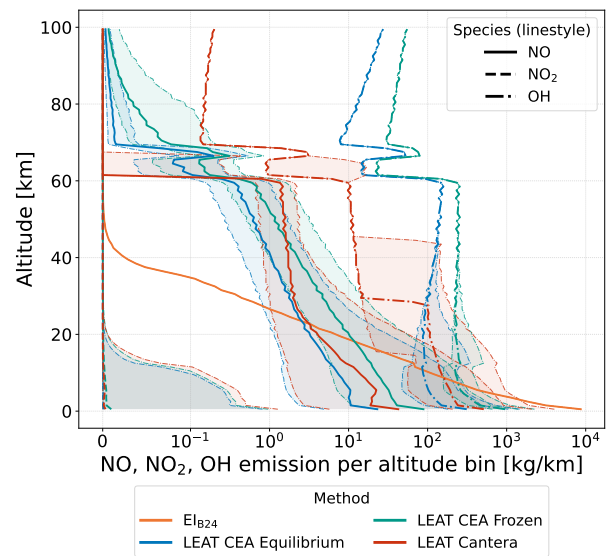

(b) NO, NO<sub>2</sub> and OH

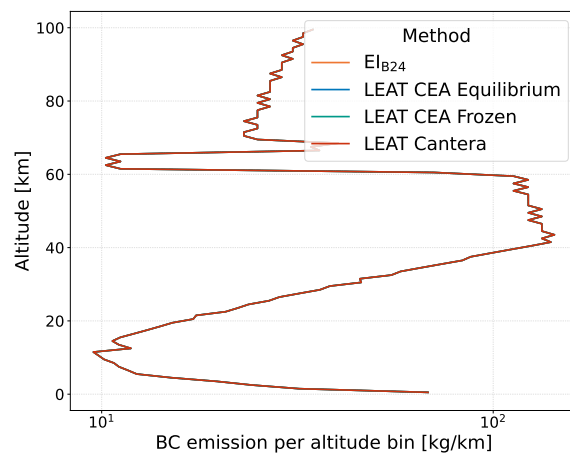

(c) BC

**Figure S6.** Final emission of Starship IFT8 launch depending on altitude shown for different calculation methodologies. Area represents  $x_{ab} = 1.2 - 8$ , line represents  $x_{ab} = 2$ .

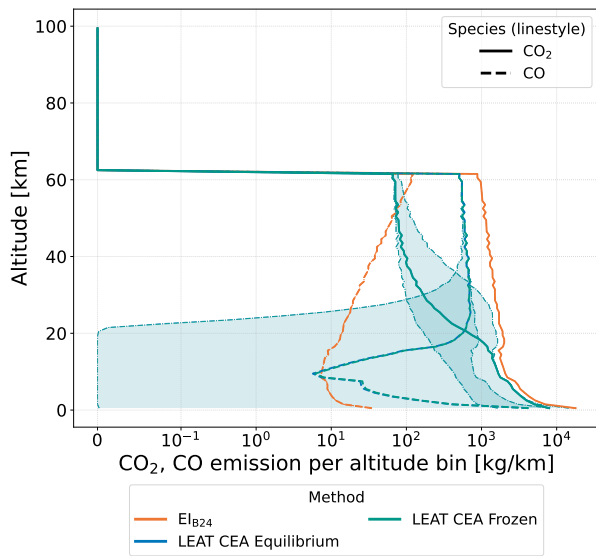(a) CO<sub>2</sub> and CO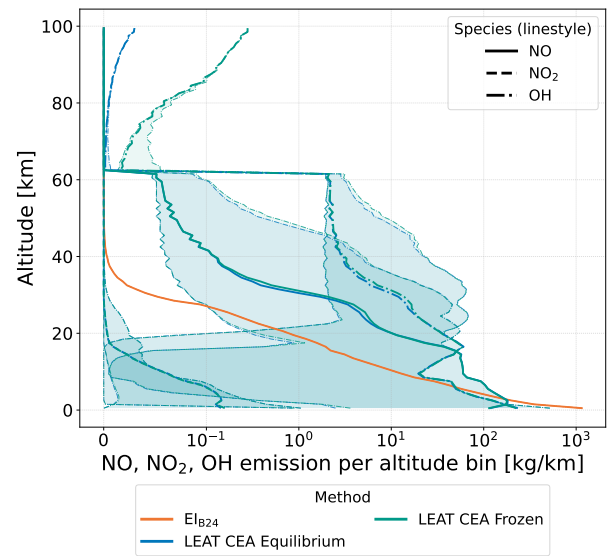(b) NO, NO<sub>2</sub> and OH

**Figure S7.** Final emission of Ariane 6 launch depending on altitude shown for different calculation methodologies. Area represents  $x_{ab} = 1.2 - 8$ , line represents  $x_{ab} = 2$ .

### S3 Input parameters

The Tab. S16 contains all inputs needed to define the launch scenario and launch vehicle.

Table S16: Input parameters of LEAT

| Parameter                           | Description                                            | Format   | Unit                     |
|-------------------------------------|--------------------------------------------------------|----------|--------------------------|
| launch_sites.xlsx                   | Geographic data of launch sites                        |          |                          |
| launch_site                         | Name for launch site                                   | string   | -                        |
| lat                                 | Latitude of launch pad                                 | float    | °                        |
| lon                                 | Longitude of launch pad                                | float    | °                        |
| alt                                 | Altitude of launch pad                                 | float    | m                        |
| scenarios.xlsx                      | Launch specific data                                   |          |                          |
| scenario                            | Name for scenario                                      | string   | -                        |
| launch_vehicle                      | Name of launch vehicle from launch vehicle database    | string   | -                        |
| date                                | Date of launch                                         | datetime | YYYY-MM-DD<br>HH:MM:SS T |
| launch_site                         | Name of launch site from launch sites file             | string   | -                        |
| azimuth                             | Azimuth of launch                                      | float    | °                        |
| payload_mass                        | Mass of payload                                        | float    | kg                       |
| h_gt_start                          | Altitude of start of gravity turn                      | float    | m                        |
| h_gt_end                            | Altitude of end of gravity turn                        | float    | m                        |
| gamma_gt_total                      | Change of gamma of gravity turn                        | float    | °                        |
| t_startup                           | Time of startup till full thrust                       | float    | m                        |
| t_fr_start                          | Time of start of thrust reduction                      | float    | s                        |
| t_fr_end                            | Time of end of thrust reduction                        | float    | s                        |
| force_reduced                       | Amount of thrust reduction                             | float    | -                        |
| LV_Database.xlsx/ LV_Database sheet | Launch vehicle data                                    |          |                          |
| LV_Type                             | Name of the launch vehicle                             | string   | -                        |
| l                                   | Total length                                           | float    | m                        |
| d                                   | Main diameter of rocket                                | float    | m                        |
| l_n                                 | Length of nose                                         | float    | m                        |
| d_n                                 | Diameter of nose                                       | float    | m                        |
| d_f                                 | Diameter of fairing                                    | float    | m                        |
| A_e/A_R                             | Ratio of engine area to reference cross sectional area | float    | -                        |
| A_R                                 | Reference cross sectional area                         | float    | m                        |
| start_with_booster                  | If booster and first stage are ignited together        | boolean  | -                        |
| stageX_engine                       | Name of stage engine from engine datasheet             | string   | -                        |
| stageX_force_sl                     | Thrust of stage at sea level                           | float    | N                        |
| stageX_force_vac                    | Thrust of stage in vacuum                              | float    | N                        |

*Continued on next page*

| <b>Parameter</b>                  | <b>Description</b>                                      | <b>Format</b> | <b>Unit</b> |
|-----------------------------------|---------------------------------------------------------|---------------|-------------|
| stageX_fuel                       | Name of stage oxidizer and fuel                         | string        | -           |
| stageX_fuel_temp                  | Temperature of stage propellants                        | float         | K           |
| stageX_total_propellant           | Total mass of stage propellant                          | float         | kg          |
| stageX_propellant_massfractions   | Massfraction of stage propellants                       | float         | -           |
| stageX_mass_fuel                  | Total mass of stage fuel                                | float         | kg          |
| stageX_mass_ox                    | Total mass of stage oxidizer                            | float         | kg          |
| stageX_dry_mass                   | Total mass of stage drymass                             | float         | kg          |
| stageX_burntime                   | Burning time of stage                                   | float         | s           |
| <hr/>                             |                                                         |               |             |
| LV_Database.xlsx/<br>Engine sheet | Launch vehicle engine data                              |               |             |
| <hr/>                             |                                                         |               |             |
| engine                            | Name of engine                                          | string        | -           |
| Ae/At                             | Nozzle area expansion ratio                             | float         | -           |
| p_chamber                         | Pressure of combustion chamber                          | float         | bar         |
| engine_cycle                      | Type of engine cycle (GG = Gasgenerator)                | float         | -           |
| mf_oc                             | Share of massflux threw gas generator                   | float         | m           |
| rof_oc                            | Ratio of oxidizer to fuel for gas generator             | string        | -           |
| Ae/At_oc                          | Nozzle expansion ratio of gas generator                 | float         | -           |
| p_chamber_oc                      | Pressure in the combustion chamber of the gas generator | float         | bar         |

## S4 Configuration parameters

The Tab. S17 contains the configurations that could be made when using the tool.

Table S17: Configuration parameters of LEAT

| Parameter                    | Description                                                                                                                                                                          | Format                               | Unit   |
|------------------------------|--------------------------------------------------------------------------------------------------------------------------------------------------------------------------------------|--------------------------------------|--------|
| General Config               |                                                                                                                                                                                      | Configurations for calculations      |        |
| all_scenarios                | When False only the user_defined_scenarios will be processed                                                                                                                         | boolean                              | -      |
| user_defined_scenarios       | Scenarios to be calculated if all_scenarios = False                                                                                                                                  | array of strings                     | -      |
| use_external_trajectory_data | Trajectory for input for one scenario                                                                                                                                                | boolean                              | -      |
| file_name_ext_trajectory     | File name of external trajectory                                                                                                                                                     | string                               | -      |
| Trajectory Config            |                                                                                                                                                                                      | Trajectory calculation configuration |        |
| t_max                        | Maximum simulation time                                                                                                                                                              | integer                              | s      |
| numeric_method               | Numerical calculation method to be used ('RK45', 'RK23', 'DOP853', 'BDF')                                                                                                            | string                               | -      |
| max_step                     | Step size                                                                                                                                                                            | float                                | s      |
| atol                         | Absolute tolerance                                                                                                                                                                   | integer                              | -      |
| rtol                         | Relative tolerance                                                                                                                                                                   | integer                              | -      |
| use_ode_break                | Choose if you want to include an ODE Break Event based on height                                                                                                                     | boolean                              | -      |
| height_ode_break             | Maximum Simulation Height                                                                                                                                                            | integer                              | m      |
| v_0                          | Initial state: Speed without earth rotation                                                                                                                                          | integer                              | m/s    |
| x_0                          | Initial state: Horizontal distance                                                                                                                                                   | integer                              | m      |
| s_0                          | Initial state: Total distance                                                                                                                                                        | integer                              | m      |
| gamma_0                      | Path angle relative to horizon initially at 90° (vertical start)                                                                                                                     | integer                              | °      |
| compress_data                | Compress trajectory data                                                                                                                                                             | boolean                              | -      |
| compress_method              | Choose between "time" or "height" as the compression interval                                                                                                                        | string                               | -      |
| compress_interval            | Choose interval steps                                                                                                                                                                | integer                              | s or m |
| compress_atmosphere          | Choose "averages" to average the atmosphere data of the interval Or choose "latest" for just the value at the given time/height step                                                 | string                               | -      |
| interval_tolerance           | Allow for floating-point precision issues                                                                                                                                            | float                                | -      |
| Emissions Config             |                                                                                                                                                                                      | Emission calculation configuration   |        |
| calculate_emissions          | Choose if you want to include emission calculation to trajectory calculation                                                                                                         | boolean                              | -      |
| use_emission_factors         | Calculation with emission indices                                                                                                                                                    | boolean                              | -      |
| emission_factor_method       | Calculation methodology of emission indices (stoichiometric, LEAT, Barker2024_seco, Brown2024, James2021, Larson2017, Pradon2023, Ross2009, Ross2014, Ryan2022, or own added values) | string                               | -      |
| use_nasa_cea                 | Calculation with NASA CEA                                                                                                                                                            | boolean                              | -      |
| use_cantera                  | Calculation with Cantera                                                                                                                                                             | boolean                              | -      |
| calculate_black_carbon       | Additional BC calculation according to James et al. 2021                                                                                                                             | boolean                              | -      |

*Continued on next page*

| <b>Parameter</b>           | <b>Description</b>                                                                    | <b>Format</b>    | <b>Unit</b> |
|----------------------------|---------------------------------------------------------------------------------------|------------------|-------------|
| threshold                  | Threshold for species to be considered not zero                                       | float            | -           |
| trace                      | Value until CEA considers trace gases                                                 | float            | -           |
| rocket_equilibrium         | Use equilibrium for CEA calculation                                                   | boolean          | -           |
| rocket_frozen              | Use frozen for CEA calculation                                                        | boolean          | -           |
| frozen_nfz                 | Defines the point of reaction freezing (1 = combustion chamber, 2 = throat, 3 = exit) | integer          | -           |
| frozen_nfz_exception_fuels | Defines the propellants for which the exception freezing point is taken into account  | array of strings | -           |
| frozen_nfz_exception       | Defines the point of reaction freezing for exception fuels                            | integer          | -           |
| afterburning               | Include afterburning calculation                                                      | boolean          | -           |
| problem_afterburning       | Defines the mode of afterburning (tp, hp & uv)                                        | string           | -           |
| x_ab                       | Afterburning uncertainty factor                                                       | float            | -           |

## 70 S5 File structure

### LEAT

|                                                                                                                               |                                           |
|-------------------------------------------------------------------------------------------------------------------------------|-------------------------------------------|
|  <code>input_data/</code>                    | Contains all input files                  |
|  <code>cea_species.yaml</code>               | Thermodynamic database of CEA for Cantera |
|  <code>config.py</code>                      | Configurations of program                 |
|  <code>emission_factors.xlsx</code>          | Emission indices database                 |
|  <code>launch_sites.xlsx</code>              | Launch sites database                     |
|  <code>LV_Database.xlsx</code>               | Launch vehicle database                   |
|  <code>scenarios.xlsx</code>                 | Scenarios database                        |
|  <code>trajectory_results_cleaned.csv</code> | Input trajectory example                  |
|  <code>NASA_CEA/</code>                      | NASA CEA tool and related files           |
|  <code>output_data/</code>                   | Folder for storing output results         |
|  <code>data_raw/</code>                      | Raw output files                          |
|  <code>emissions/</code>                     | Emission results                          |
|  <code>trajectory/</code>                    | Trajectory and atmospheric data           |
|  <code>plot_emission.py</code>               | Plots emission in altitude bars           |
|  <code>scripts/</code>                      | Helper scripts                            |
|  <code>data_processing.py</code>           | Handles data inputs and outputs           |
|  <code>emissions.py</code>                 | Emission calculation script               |
|  <code>trajectory.py</code>                | Trajectory calculation script             |
|  <code>cleanup_output_data.py</code>       | Script to clear output data               |
|  <code>LICENSE.txt</code>                  | Software License Agreement                |
|  <code>main.py</code>                      | Main entry point for the tool             |
|  <code>README.md</code>                    | Main README                               |
|  <code>requirements.txt</code>             | Required Python Modules                   |

## References

- Barker, C. R., Marais, E. A., and McDowell, J. C.: Global 3D Rocket Launch and Re-Entry Air Pollutant and CO<sub>2</sub> Emissions at the Onset of the Megaconstellation Era, *Scientific Data*, 11, 1079, <https://doi.org/10.1038/s41597-024-03910-z>, 2024.
- 75 Barker, C. R., Marais, E. A., Tan, E. Y. P., Eastham, S. D., Diskin, G. S., DiGangi, J. P., Choi, Y., Rollins, A. W., Waxman, E., Bui, T. P., Gatebe, C. K., Dean-Day, J., and Poudyal, R.: Radiative Forcing and Ozone Depletion of a Decade of Satellite Megaconstellation Missions, *Earth's Future*, 14, e2025EF007 229, <https://doi.org/10.1029/2025EF007229>, 2026.
- Danilin, M. Y., Popp, P. J., Herman, R. L., Ko, M. K. W., Ross, M. N., Kolb, C. E., Fahey, D. W., Avallone, L. M., Toohey, D. W., Ridley, B. A., Schmid, O., Wilson, J. C., Baumgardner, D. G., Friedl, R. R., Thompson, T. L., and Reeves, J. M.: Quantifying Uptake of HNO<sub>3</sub> and H<sub>2</sub>O by Alumina Particles in Athena-2 Rocket Plume, *Journal of Geophysical Research: Atmospheres*, 108, 2002JD002 601, <https://doi.org/10.1029/2002JD002601>, 2003.
- 80 Federal Aviation Administration: Final Environmental Assessment and Finding of No Significant Impact for SpaceX Falcon Launches at Kennedy Space Center and Cape Canaveral Air Force Station, Tech. rep., 2020.
- Hermesen, R.: Aluminum Oxide Particle Size for Solid Rocket Motor Performance Prediction, *Journal of Spacecraft and Rockets*, 18, 483–490, <https://doi.org/10.2514/3.57845>, 1981.
- 85 James, M. M., Lympany, S. V., Salton, A. R., Matthew F. Calton, Miake-Lye, R. C., and Wayson, R. L.: Commercial Space Vehicle Emissions Modeling, Transportation Research Board, Washington, D.C., <https://doi.org/10.17226/26142>, 2021.
- Larson, E. J. L., Portmann, R. W., Rosenlof, K. H., Fahey, D. W., Daniel, J. S., and Ross, M. N.: Global Atmospheric Response to Emissions from a Proposed Reusable Space Launch System, *Earth's Future*, 5, 37–48, <https://doi.org/10.1002/2016EF000399>, 2017.
- 90 Newman, P. A., Wilson, J. C., Ross, M. N., Brock, C. A., Sheridan, P. J., Schoeberl, M. R., Lait, L. R., Bui, T. P., Loewenstein, M., and Podolske, J. R.: Chance encounter with a stratospheric kerosene rocket plume from Russia over California, 28, 959–962, <https://doi.org/10.1029/2000GL011972>.
- Popp, P. J., Ridley, B. A., Neuman, J. A., Avallone, L. M., Toohey, D. W., Zittel, P. F., Schmid, O., Herman, R. L., Gao, R. S., Northway, M. J., Holecek, J. C., Fahey, D. W., Thompson, T. L., Kelly, K. K., Walega, J. G., Grahek, F. E., Wilson, J. C., Ross, M. N., and Danilin, M. Y.: The Emission and Chemistry of Reactive Nitrogen Species in the Plume of an Athena II Solid-fuel Rocket Motor, *Geophysical Research Letters*, 29, <https://doi.org/10.1029/2002GL015197>, 2002.
- 95 Ross, M. N., Benbrook, J. R., Sheldon, W. R., Zittel, P. F., and McKenzie, D. L.: Observation of Stratospheric Ozone Depletion in Rocket Exhaust Plumes, *Nature*, 390, 62–64, <https://doi.org/10.1038/36318>, 1997.
- Ryan, R. G., Marais, E. A., Balhatchet, C. J., and Eastham, S. D.: Impact of Rocket Launch and Space Debris Air Pollutant Emissions on Stratospheric Ozone and Global Climate, *Earth's Future*, 10, e2021EF002 612, <https://doi.org/10.1029/2021EF002612>, 2022.
- 100 Safran: Vulcain 2.1 Hot Gas Valve (VGC 2.1), <https://www.safran-group.com/products-services/vulcain-21-hot-gas-valve-vgc-21>.
- Simmons, F.: Rocket Exhaust Plume Phenomenology, American Institute of Aeronautics and Astronautics, Inc., Washington, DC, <https://doi.org/10.2514/4.989087>, 2000.
